# Supplementary material
Source: publisher figshare collection journal article supplement (https://acs.figshare.com/ndownloader/files/15450395)
Supplement: Supplementary file 1 [file 15450395]

**Supporting Information**  
**A Record-Breaking Loading Capacity for**  
**Single-Molecule Magnet Mn<sub>12</sub> Clusters Achieved in a**  
**Mesoporous Ln-MOF**

*Hui-Jun Chen,<sup>†</sup> Xiu-Ying Zheng,<sup>†</sup> Ya-Rui Zhao,<sup>†</sup> Da-Qiang Yuan,<sup>\*,††</sup> Xiang-Jian Kong,<sup>†</sup> La-Sheng Long,<sup>\*,†</sup> and  
Lan-Sun Zheng<sup>†</sup>*

<sup>†</sup>Collaborative Innovation Center of Chemistry for Energy Materials, State Key Laboratory of Physical Chemistry of Solid Surface and Department of Chemistry, College of Chemistry and Chemical Engineering, Xiamen University, Xiamen, 361005, China.

<sup>††</sup> State Key Laboratory of Structural Chemistry, Fujian Institute of Research on the Structure of Matter, Chinese Academy of Sciences, Fuzhou, 350002, China

\* Corresponding Authors: [lslong@xmu.edu.cn](mailto:lslong@xmu.edu.cn)

[ydq@fjirsm.ac.cn](mailto:ydq@fjirsm.ac.cn)

## General Procedures

All materials, reagents were of commercial origin and used without further purification. Microanalyses of C, H, and N were determined by a CE instruments EA 1110 elemental analyzer. The infrared spectrum was recorded on a Nicolet AVATAR FT-IR 330 Spectrophotometer with pressed KBr pellets. Magnetic measurement was tested by using a Quantum Design MPMS superconducting quantum interference device (SQUID). Thermogravimetric analysis (TGA) and differential scanning calorimetry (DSC) curves were measured by a SDT-Q600 thermal analyzer in N<sub>2</sub> atmosphere. Thermogravimetric analysis (TGA) curves were recorded on a Netzsch TG209F1 thermal analyzer in air atmosphere. Powder X-ray diffraction patterns were collected by a Rigaku Ultima IV diffractometer with Cu K $\alpha$  radiation ( $\lambda$  = 1.5418 Å) and a graphite monochromator from 3 to 50° at room temperature. The La-Mn ratio data was evaluated by an Agilent 7700x ICP-MS and analyzed using ICP-MS MassHunter version B01.03. Energy dispersive X-ray (EDX) spectrum was marked on scanning electron microscopy (SEM) (Hitachi S-4800, 15kV). <sup>1</sup>H NMR spectrum was recorded on a Bruker Avance III 500MHz spectrometer. The adsorption samples were activated in dried EtOH at first and then were evacuated in a Tousimis Samdri-PVT-3D by supercritical carbon dioxide so that the EtOH guests were completely replaced by liquid CO<sub>2</sub>. N<sub>2</sub> adsorption isotherms were performed on Micromeritics ASAP 2020 PLUS. The pore size distribution (PSD) curves were calculated using Harkins and Jura Thickness model for N<sub>2</sub> adsorption.

## X-ray crystallography.

Structure Data of **1** were determined by an Agilent technologies Super Nova Micro Focus single Crystal Diffractometer using Cu-K $\alpha$  radiation ( $\lambda$  = 1.54184 Å). Absorption corrections were carried out by using the multi-scan program. The structure was solved by direct methods (ShelXT),<sup>1</sup> and the non-hydrogen atoms were refined anisotropically by full-matrix least-squares method on F<sup>2</sup> using ShelXL on the OLEX 2.<sup>2,3</sup> Guest molecules were removed through SQUEEZE in structure refinement due to disorder.<sup>4</sup> For **1R**(298K), there are 1887 electrons within 9623 Å<sup>3</sup> void volume per unit cell, corresponding to 7 DMF and 3.5 water molecules per formula unit. For **1S**(298K), the SQUEEZE analyses reveal that there are 2229 electrons within 9788 Å<sup>3</sup> void volume per unit cell. There are extra 7 DMF and 9 water molecules per formula unit based on calculation. However, the amount of water molecules was inconstant at ambient due to the existence of mesopores. TGA results shows 3.37% weight loss from room temperature to 100 °C in N<sub>2</sub> atmosphere, corresponding to the loss of five water molecules (calcd. 3.60%) (**Figure S8a, S12**). CCDC 1886724-1886727 contain the supplementary crystallographic data for **1R**(100K), **1R**(298K), **1S**(100K) and **1S**(298K), respectively. These data can be obtained free of charge from the Cambridge Crystallographic Data Centre.

## Syntheses of samples.

### Syntheses of Mn<sub>12</sub>O<sub>12</sub>(Ac)<sub>16</sub>(H<sub>2</sub>O)<sub>4</sub>•HAc•4H<sub>2</sub>O (Mn<sub>12</sub>Ac).

**Mn<sub>12</sub>Ac** was obtained by the method introduced in previous literature.<sup>5</sup> The filtrated solid materials washed by dried CH<sub>3</sub>CN in order to remove partial guest CH<sub>3</sub>COOH molecules. X-ray powder diffraction (PXRD) was used to confirm the purity of the crystalline solid (**Figure S13**). Anal. Calcd. for Mn<sub>12</sub>H<sub>68</sub>C<sub>34</sub>O<sub>54</sub> (FW = 2000.13, based on one CH<sub>3</sub>COOH and four water guest molecules): C, 20.42%; H, 3.43%. Found: C, 20.56%; H, 3.65%. IR for **Mn<sub>12</sub>Ac** (KBr pallet, cm<sup>-1</sup>) (**Figure S14**): 3598(s), 3347(w), 2935(w), 1756(w), 1709(s), 1589(s), 1562(s), 1515(s), 1445(s), 1388(w), 1331(s), 1256(w), 1050(s), 1023(s), 958(s), 931(w), 713(s), 674(s), 641(s), 610(s), 561(s),

514(s), 408(s).

### Syntheses of $\text{La}_4(\text{HL})_5(\text{HLac})_2(i\text{-PrOH})_2(\text{DMF})_2 \cdot 7\text{DMF} \cdot 5\text{H}_2\text{O}$ (**1**).

A mixture of  $\text{La}(\text{NO}_3)_3 \cdot 6\text{H}_2\text{O}$  (0.217 g, 0.5 mmol), 5-Hydroxyisophthalic acid ( $\text{H}_3\text{L}$ , 0.091 g, 0.5 mmol) and racemic lactic acid (*rac*- $\text{H}_2\text{Lac}$ , 4 drops) were added to the mixed solution of N,N-dimethylformamide (DMF, 9 mL) and isopropanol (*i*-PrOH, 1 mL). The resulting mixture was then sealed in a 23 mL Teflon-lined stainless steel container after stirring for a period of time. The container and its content were heated to 120 °C and maintained at this temperature for 2 days, then cooled to 30 °C at a rate of 2 °C/h. Colorless rod-like crystals of **1R** and **1S** (yield 45% based on  $\text{H}_3\text{L}$ ) were collected after washing with dried DMF. TGA results shows 3.37% weight loss from room temperature to 100 °C in  $\text{N}_2$  atmosphere, corresponding to the loss of five water molecules (calcd. 3.60%) (**Figure S8a, S12**). Anal. Calcd. for  $\text{La}_4\text{H}_{119}\text{C}_{79}\text{N}_9\text{O}_{47}$  (FW = 2502.44, based on seven DMF and five water guest molecules): C, 37.92%; H, 4.79%; N, 5.04%. Found: C, 38.09%; H, 4.76%; N, 4.95%. IR for **1** (KBr pallet,  $\text{cm}^{-1}$ ) (**Figure S14**): 3386(s), 2970(w), 2692(w), 2510(w), 1658(s), 1552(s), 1376(s), 1380(s), 1301(w), 1273(m), 1221(m), 1105(s), 1056(m), 1002(s), 973(s), 936(s), 894(s), 861(s), 777(s), 725(s), 670(s), 613(s), 552(s), 492(m), 440(s).

### Preparation of $\text{Mn}_{12}\text{Ac}@\mathbf{1}$ sample.

In the consideration of gradual degradation of  $\text{Mn}_{12}\text{Ac}$  in DMF, racemic crystals of **1** were washed by dried  $\text{CH}_3\text{CN}$  for several times and immersed in dried  $\text{CH}_3\text{CN}$  for 3 days to remove the guest DMF molecules. X-ray powder diffraction confirms the integrity of the structure (**Figure S5**). Anal. Calcd. for activated sample ( $\text{La}_4\text{H}_{93}\text{C}_{60}\text{N}_3\text{O}_{50}$ , FW = 2211.99, based on one  $\text{CH}_3\text{CN}$  and 15 water guest molecules) : C, 32.58%; H, 4.24%; N, 1.90%. Found: C, 32.23%; H, 4.01%; N, 2.32%. IR for activated sample (KBr pallet,  $\text{cm}^{-1}$ ) (**Figure S14**): 3358(s), 2933(w), 2695(w), 2529(w), 1658(s), 1552(s), 1388(s), 1304(w), 1275(m), 1224(m), 1109(s), 1049(m), 1001(s), 976(s), 937(s), 893(s), 864(s), 781(s), 720(s), 673(s), 616(s), 552(s), 491(m), 440(s).

$\text{Mn}_{12}\text{Ac}@\mathbf{1}$  sample was obtained by soaking 100 mg activated sample of **1** in 30 mL  $\text{CH}_3\text{CN}$  solution under  $\text{N}_2$  atmosphere. In order to keep the integrity of the crystal, the shaking table with rotational speed of 150 r/min, rather than continual stirring, was used to encapsulate the  $\text{Mn}_{12}\text{Ac}$ . The deep brown solid was repeatedly washed by dried  $\text{CH}_3\text{CN}$  until supernatant liquid became colorless. IR for activated sample (KBr pallet,  $\text{cm}^{-1}$ ) (**Figure S14**): 3377(s), 2927(w), 2708(w), 2529(w), 1658(s), 1543(s), 1384(s), 1305(w), 1276(m), 1223(m), 1115(s), 1050(m), 1022(m), 1002(s), 976(s), 934(m), 892(m), 867(w), 781(s), 723(s), 669(s), 611(s), 561(w), 495(w), 441(s).

**Table S1.** Crystal parameters for **1**.

| Complex                                                                                                                              | <b>1R</b>                                                                      | <b>1R</b>                                                                      | <b>1S</b>                                                                      | <b>1S</b>                                                                      |
|--------------------------------------------------------------------------------------------------------------------------------------|--------------------------------------------------------------------------------|--------------------------------------------------------------------------------|--------------------------------------------------------------------------------|--------------------------------------------------------------------------------|
| Formula                                                                                                                              | La <sub>4</sub> C <sub>58</sub> H <sub>58</sub> N <sub>2</sub> O <sub>35</sub> | La <sub>4</sub> C <sub>58</sub> H <sub>58</sub> N <sub>2</sub> O <sub>35</sub> | La <sub>4</sub> C <sub>58</sub> H <sub>58</sub> N <sub>2</sub> O <sub>35</sub> | La <sub>4</sub> C <sub>58</sub> H <sub>58</sub> N <sub>2</sub> O <sub>35</sub> |
| Formula weight                                                                                                                       | 1898.70                                                                        | 1898.70                                                                        | 1898.70                                                                        | 1898.70                                                                        |
| Temperature / K                                                                                                                      | 100                                                                            | 298                                                                            | 100                                                                            | 298                                                                            |
| Crystal system                                                                                                                       | Hexagonal                                                                      | Hexagonal                                                                      | Hexagonal                                                                      | Hexagonal                                                                      |
| Space group                                                                                                                          | <i>P</i> 6 <sub>3</sub> 22                                                     |
| <i>a</i> / Å                                                                                                                         | 33.6836 (8)                                                                    | 34.4634 (4)                                                                    | 33.7571 (7)                                                                    | 34.4770 (4)                                                                    |
| <i>b</i> / Å                                                                                                                         | 33.6836 (8)                                                                    | 34.4634 (4)                                                                    | 33.7571 (7)                                                                    | 34.4770 (4)                                                                    |
| <i>c</i> / Å                                                                                                                         | 18.6292 (5)                                                                    | 18.7047 (2)                                                                    | 18.6144 (3)                                                                    | 18.7059 (2)                                                                    |
| $\alpha$ / °                                                                                                                         | 90.00                                                                          | 90.00                                                                          | 90.00                                                                          | 90.00                                                                          |
| $\beta$ / °                                                                                                                          | 90.00                                                                          | 90.00                                                                          | 90.00                                                                          | 90.00                                                                          |
| $\gamma$ / °                                                                                                                         | 120.00                                                                         | 120.00                                                                         | 120.00                                                                         | 120.00                                                                         |
| <i>V</i> / Å <sup>3</sup>                                                                                                            | 18304.7 (8)                                                                    | 19239.7 (5)                                                                    | 18370.0 (8)                                                                    | 19256.1 (5)                                                                    |
| Formula units <i>Z</i>                                                                                                               | 6                                                                              | 6                                                                              | 6                                                                              | 6                                                                              |
| <i>D</i> <sub>c</sub> / g cm <sup>-3</sup>                                                                                           | 1.033                                                                          | 0.983                                                                          | 1.030                                                                          | 0.982                                                                          |
| $\mu$ / mm <sup>-1</sup>                                                                                                             | 11.06                                                                          | 10.52                                                                          | 11.02                                                                          | 10.51                                                                          |
| Data/parameters                                                                                                                      | 10460/444                                                                      | 10870/456                                                                      | 11819/444                                                                      | 13005/466                                                                      |
| $2\theta$ / °                                                                                                                        | 7.0-131.8                                                                      | 7.0-130.0                                                                      | 7.0-143.4                                                                      | 7.0 - 149.8                                                                    |
| Observed reflections                                                                                                                 | 39317                                                                          | 92950                                                                          | 44180                                                                          | 49813                                                                          |
| <i>F</i> (000)                                                                                                                       | 5568                                                                           | 5568                                                                           | 5568                                                                           | 5568                                                                           |
| GOOF                                                                                                                                 | 1.05                                                                           | 1.07                                                                           | 1.03                                                                           | 1.06                                                                           |
| <i>R</i> <sub>1</sub> [ <i>I</i> > 2 $\sigma$ ( <i>I</i> )] <sup>a</sup>                                                             | 0.079                                                                          | 0.059                                                                          | 0.053                                                                          | 0.068                                                                          |
| <i>wR</i> <sub>2</sub> (All data) <sup>b</sup>                                                                                       | 0.204                                                                          | 0.165                                                                          | 0.138                                                                          | 0.195                                                                          |
| <i>R</i> (int)                                                                                                                       | 0.068                                                                          | 0.096                                                                          | 0.059                                                                          | 0.062                                                                          |
| Absolute structure parameter                                                                                                         | 0.154 (11)                                                                     | 0.124 (10)                                                                     | 0.110 (8)                                                                      | 0.152 (10)                                                                     |
| CCDC number                                                                                                                          | 1886724                                                                        | 1886725                                                                        | 1886726                                                                        | 1886727                                                                        |
| <sup>a</sup> $R_1 = \sum   F_o  -  F_c   / \sum  F_o $ <sup>b</sup> $wR_2 = \{\sum [w(F_o^2 - F_c^2)^2] / \sum [w(F_o^2)^2]\}^{1/2}$ |                                                                                |                                                                                |                                                                                |                                                                                |

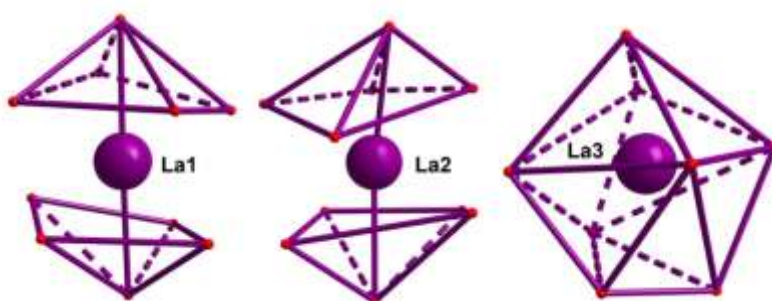**Figure S1.** Ball-and-stick representation of coordination environments of La(III) in **1S**.

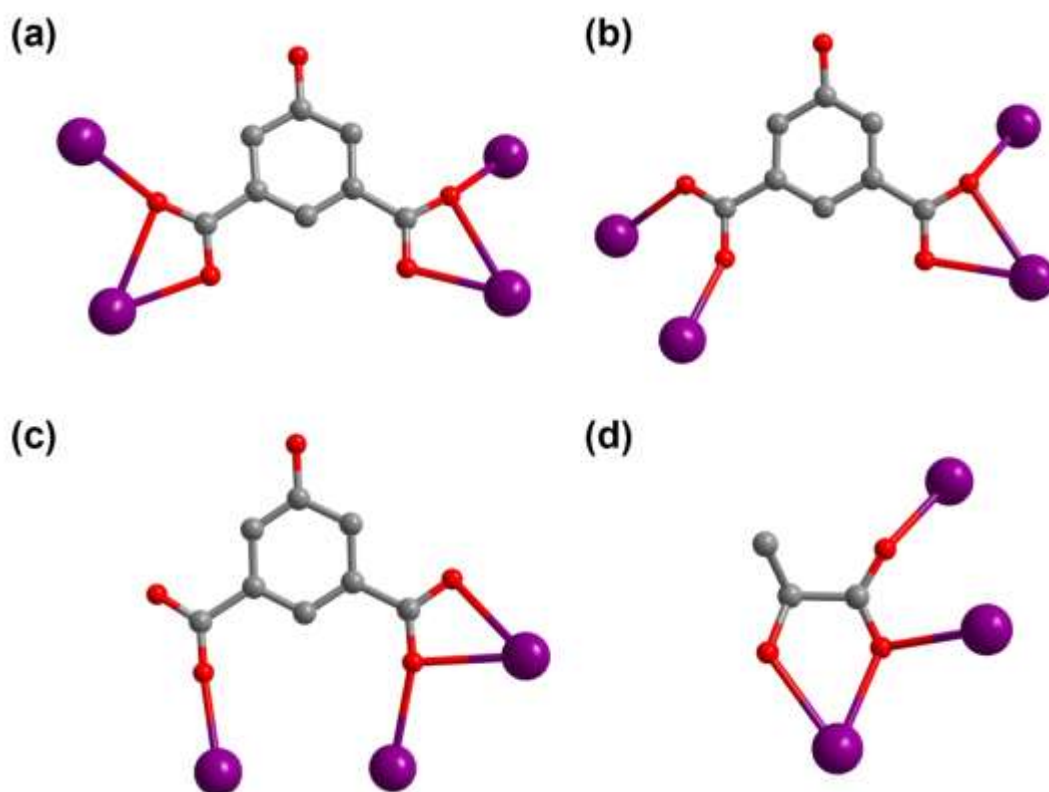

**Figure S2.** Coordination modes of  $\text{HL}^{2-}$  in  $\mu_4:\eta^2:\eta^1:\eta^2:\eta^0$  (a),  $\mu_4:\eta^2:\eta^1:\eta^1:\eta^0$  (b) and  $\mu_3:\eta^1:\eta^2:\eta^1:\eta^0$  fashion (c) respectively; coordination mode of deprotonated lactic acid in  $\mu_3:\eta^1:\eta^2:\eta^1$  fashion (d) in **1S**.

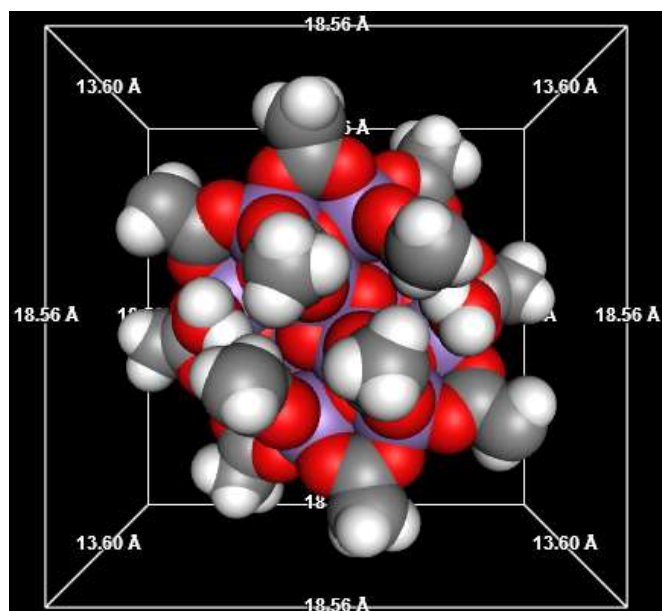

**Figure S3.** Dimension of single  $\text{Mn}_{12}\text{Ac}$  cluster.

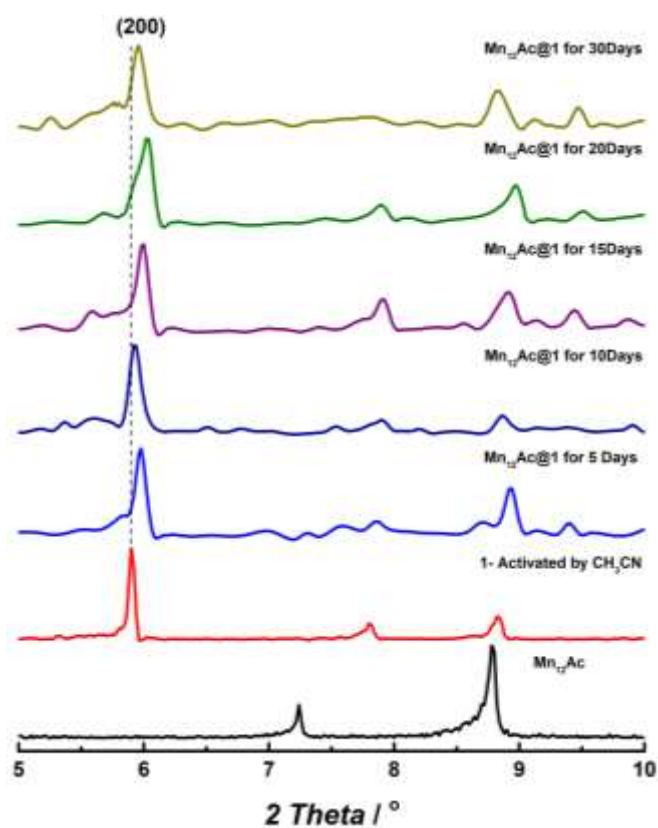

**Figure S4.** X-ray powder diffraction (PXRD) patterns of  $\text{Mn}_{12}\text{Ac}$ , **1** activated by  $\text{CH}_3\text{CN}$ ,  $\text{Mn}_{12}\text{Ac}@1$  for different immersing times.

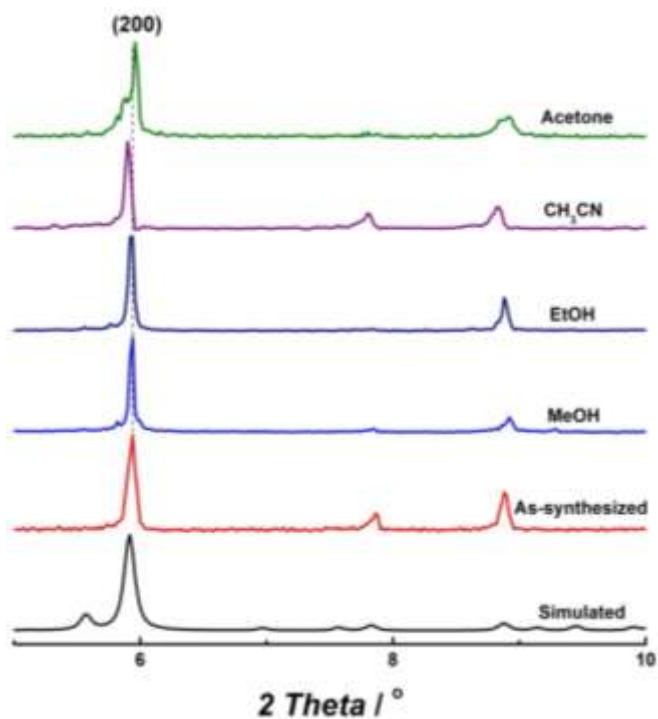

**Figure S5.** X-ray powder diffraction patterns (PXRD) of MOF **1** and the sample activated by different solvents.

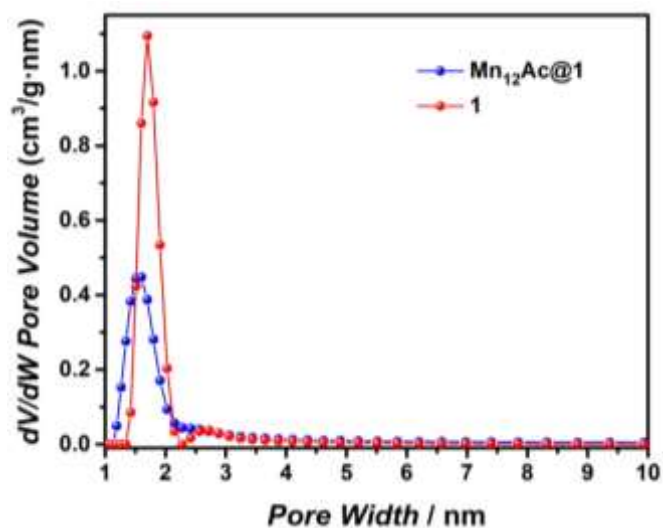

**Figure S6.** The pore size distribution (PSD) curves of **1** (red) and **Mn<sub>12</sub>Ac@1** (blue).

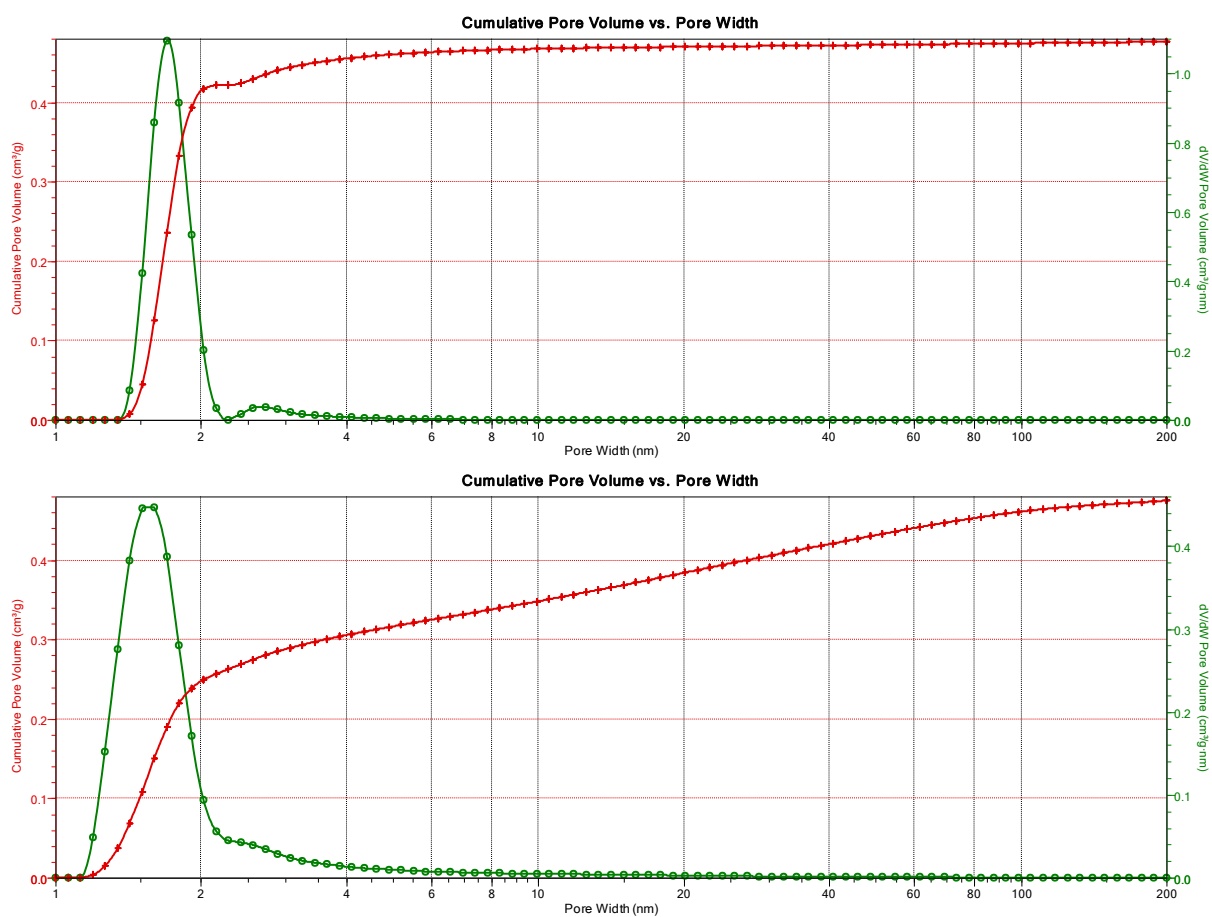

**Figure S7.** Calculation of pore size distribution (PSD) curves based on Harkins and Jura Thickness model for N<sub>2</sub> adsorption, **1** (top) and **Mn<sub>12</sub>Ac@1** (bottom).

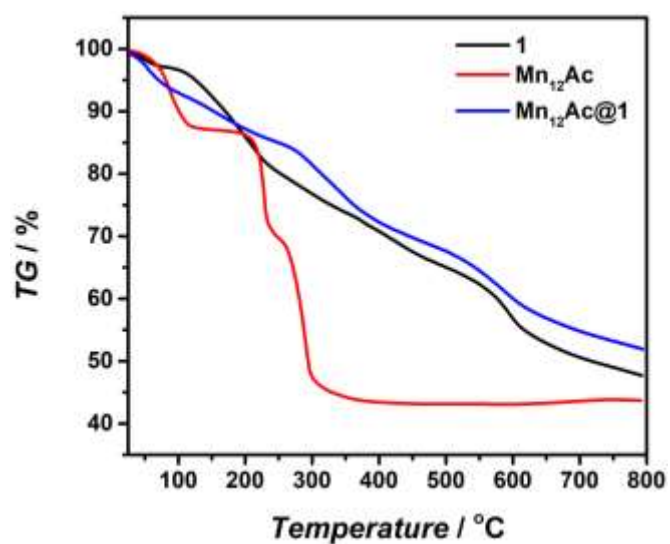

**Figure S8a.** Thermogravimetric analysis (TGA) curves of MOF **1** (black),  $\text{Mn}_{12}\text{Ac}$  (red) and  $\text{Mn}_{12}\text{Ac}@1$  (blue) in  $\text{N}_2$  atmosphere.

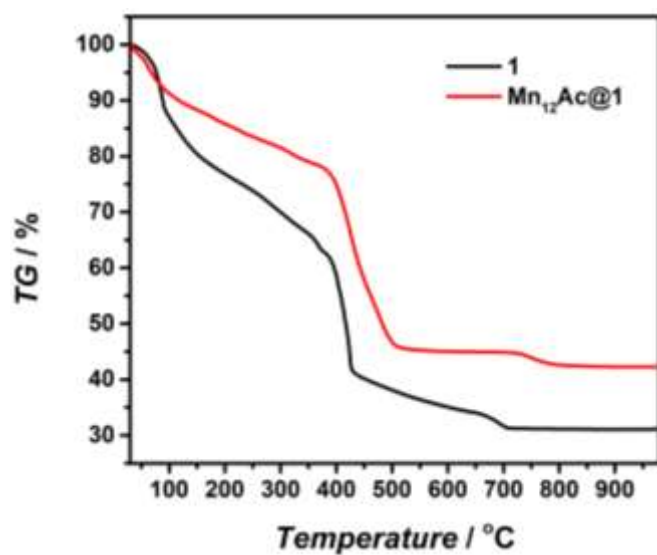

**Figure S8b.** Thermogravimetric analysis (TGA) curves of MOF **1** (black),  $\text{Mn}_{12}\text{Ac}@1$  (red) in air atmosphere.



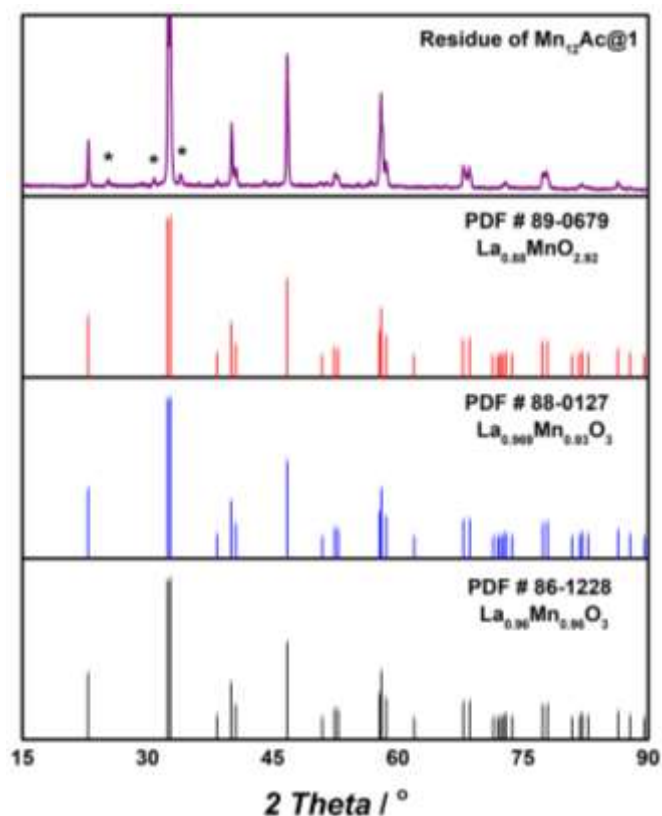

**Figure S8c.** X-ray powder diffraction (PXRD) patterns of TGA residual of **Mn<sub>12</sub>Ac@1** in air atmosphere,  $\text{La}_{0.96}\text{Mn}_{0.96}\text{O}_3$  (PDF # 86-1228),  $\text{La}_{0.969}\text{Mn}_{0.93}\text{O}_3$  (PDF # 88-0127) and  $\text{La}_{0.88}\text{MnO}_{2.92}$  (PDF # 89-0679).

Based on the XPRD patterns in **Figure S8c**, it is difficult for us to determine the composition of the residual of **Mn<sub>12</sub>Ac@1**, the accurate estimation of the loading amount of **Mn<sub>12</sub>Ac** in **1** based on the TGA data was unsuccessful, despite that the residual weight in **Mn<sub>12</sub>Ac@1** is significantly higher than that of **1**.

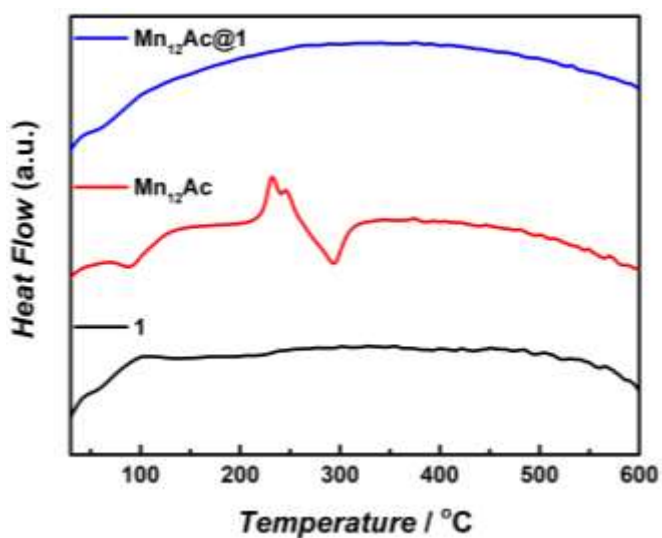

**Figure S9.** Differential scanning calorimetry (DSC) curves of MOF **1** (black), **Mn<sub>12</sub>Ac** (red) and **Mn<sub>12</sub>Ac@1** (blue).

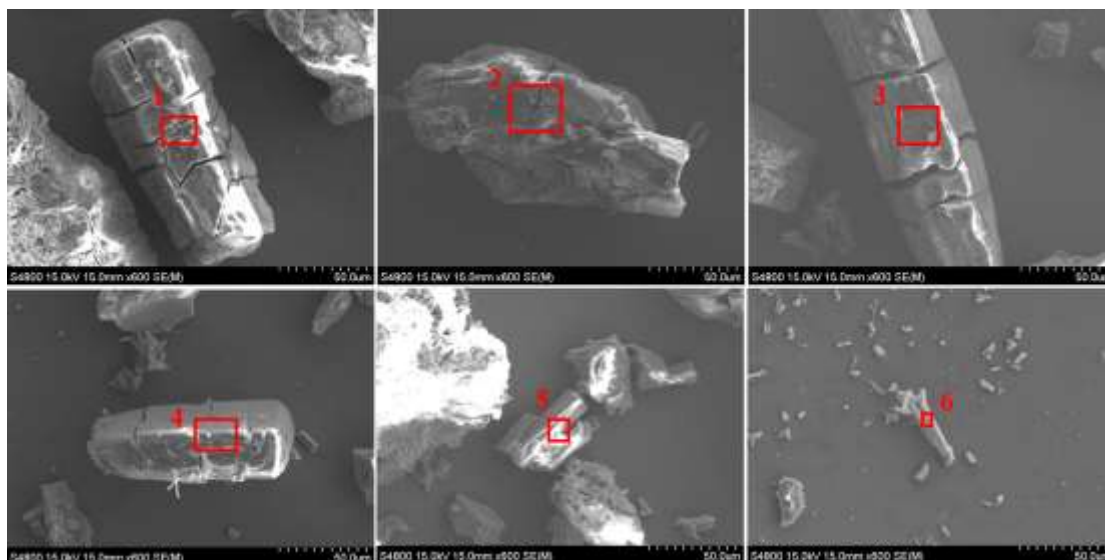

**Figure S10.** Scanning electron microscopy (SEM) images of **Mn<sub>12</sub>Ac@1** at the same amplification used for EDX analysis.

**Table S2.** La-Mn atom ratios at different selected areas according to EDX results.

| Selected Areas | La<br>(atom %) | Mn<br>(atom %) | <b>Mn<sub>12</sub>Ac:1</b><br>(mol %) | Average <b>Mn<sub>12</sub>Ac:1</b><br>(mol %) |
|----------------|----------------|----------------|---------------------------------------|-----------------------------------------------|
| 1              | 52.18          | 47.82          | 30.55                                 | 42.31                                         |
| 2              | 53.37          | 46.63          | 29.12                                 |                                               |
| 3              | 57.59          | 42.41          | 24.55                                 |                                               |
| 4              | 45.76          | 54.24          | 39.51                                 |                                               |
| 5              | 30.72          | 69.28          | 75.17                                 |                                               |
| 6              | 37.75          | 62.25          | 54.97                                 |                                               |

$$\text{Mn}_{12}\text{Ac:1 (mol \%)} = (\text{Mn} : \text{La}) * (4/12) * 100$$

(4/12) represents the metal atom ratio of **1** and **Mn<sub>12</sub>Ac** based on their molecular formulas.

**Table S3.** La-Mn atom ratios according to ICP-MS results.

| Batch | La<br>(ppb) | Mn<br>(ppb) | La<br>( $\mu\text{mol} / \text{mL}$ ) | Mn<br>( $\mu\text{mol} / \text{mL}$ ) | <b>1</b><br>( $\mu\text{mol} / \text{mL}$ ) | <b>Mn<sub>12</sub>Ac</b><br>( $\mu\text{mol} / \text{mL}$ ) | <b>Mn<sub>12</sub>Ac:1</b><br>(mol %) |
|-------|-------------|-------------|---------------------------------------|---------------------------------------|---------------------------------------------|-------------------------------------------------------------|---------------------------------------|
| 1     | 1139        | 552         | $8.200144 \times 10^{-3}$             | $1.0047324 \times 10^{-2}$            | $2.050036 \times 10^{-3}$                   | $8.37277 \times 10^{-4}$                                    | 40.84                                 |
| 2     | 1168        | 550         | $8.408927 \times 10^{-3}$             | $1.0010921 \times 10^{-2}$            | $2.102232 \times 10^{-3}$                   | $8.34243 \times 10^{-4}$                                    | 39.68                                 |
| 3     | 1047        | 496         | $7.537797 \times 10^{-3}$             | $9.028031 \times 10^{-3}$             | $1.884449 \times 10^{-3}$                   | $7.52336 \times 10^{-4}$                                    | 39.92                                 |

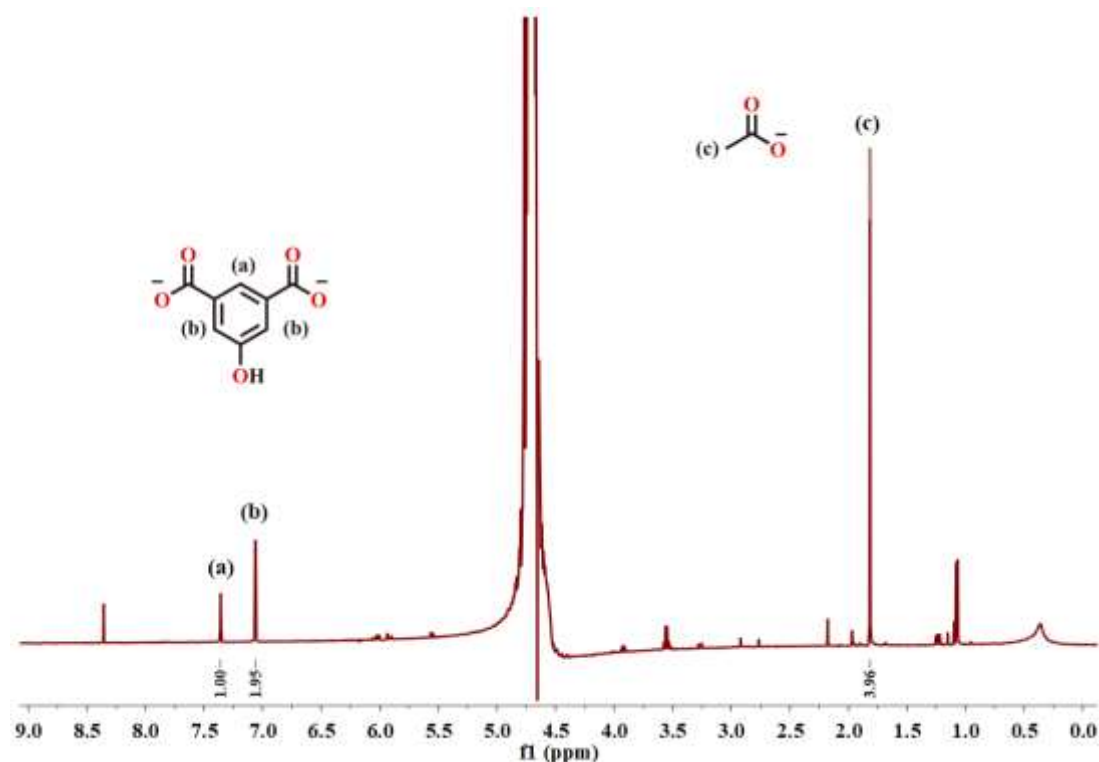

**Figure S11.**  $^1\text{H}$  NMR spectrum of **Mn<sub>12</sub>Ac@1** in NaOD/D<sub>2</sub>O.

Sample pretreatment: 8  $\mu\text{L}$  40 wt% NaOD was added into 1.0 mg **Mn<sub>12</sub>Ac@1** sample, and the mixture was diluted by 1 mL D<sub>2</sub>O. After sonication and filtration, colorless solution was obtained at last.

**1-[La<sub>4</sub>(HL)<sub>5</sub>(HLac)<sub>2</sub>(*i*-PrOH)<sub>2</sub>(DMF)<sub>2</sub>]**: Signals at 7.3 ppm and 7.0 ppm with integral of 1.00 and 1.95 respectively, which were attributed to the hydrogen atoms in HL<sup>-</sup> ligands. There are 5 H<sub>a</sub> atoms per formula unit based on Single-crystal X-ray diffraction measurement.

**Mn<sub>12</sub>Ac-[Mn<sub>12</sub>O<sub>12</sub>(Ac)<sub>16</sub>(H<sub>2</sub>O)<sub>4</sub>]**: There are 16 acetates per formula unit, which represent 48 H<sub>c</sub> atoms equivalently.

**Mn<sub>12</sub>Ac@1: 1:** **Mn<sub>12</sub>Ac** = 0.4015 according to ICP-MS measurement, that is to say, there should be 19.27 (0.4015\*48) H<sub>c</sub> atoms.

According to  $^1\text{H}$  NMR spectra, the signal at 7.3 ppm with integral of 1.00 represents 5 H<sub>a</sub>, indicating that the signals around 1.8 ppm should be attributed to 19.8 H<sub>c</sub> atoms (3.96\*5). Thus, the loading capacity is 41.25 mol% (19.8/48), well consistent with that of 40.15 mol% obtained from ICP-MS.

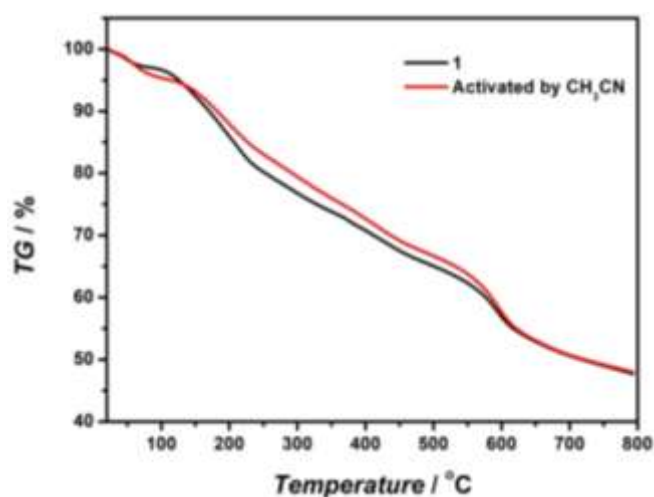

**Figure S12.** Thermogravimetric analysis (TGA) curves of MOF **1** (black) and the sample activated by  $\text{CH}_3\text{CN}$  (red) in  $\text{N}_2$  atmosphere.

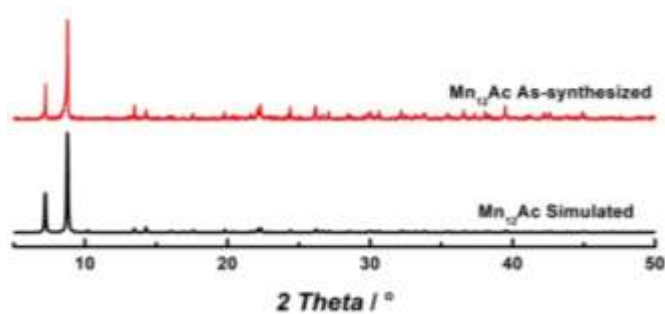

**Figure S13.** Experimental and simulated X-ray powder diffraction patterns (PXRD) of  $\text{Mn}_{12}\text{Ac}$ .

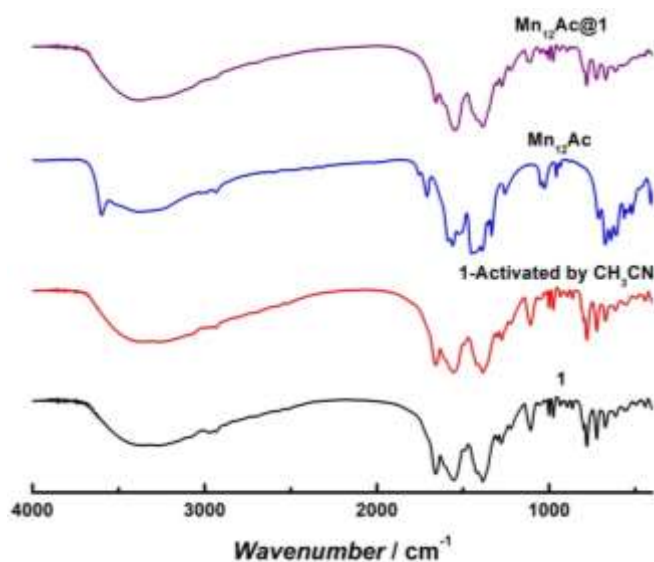

**Figure S14.** Infrared spectrum of compound **1** (black), the sample activated by  $\text{CH}_3\text{CN}$  (red),  $\text{Mn}_{12}\text{Ac}$  (blue) and  $\text{Mn}_{12}\text{Ac}@1$  (purple).

**Table S4.** Selected bond distances (Å) for compound **1R** at 100K.

| Bond                  | Dist.      | Bond                  | Dist.      |
|-----------------------|------------|-----------------------|------------|
| La1—O1                | 2.434 (9)  | La1—O3 <sup>i</sup>   | 2.758 (11) |
| La1—O4 <sup>i</sup>   | 2.594 (10) | La1—O15 <sup>i</sup>  | 2.510 (8)  |
| La1—O16 <sup>i</sup>  | 2.647 (9)  | La2—O6                | 2.594 (10) |
| La2—O11               | 2.500 (10) | La2—O12               | 2.858 (10) |
| La2—O14               | 2.457 (9)  | La2—O17               | 2.530 (11) |
| La3—O2 <sup>ii</sup>  | 2.586 (11) | La3—O3                | 2.492 (10) |
| La3—O6 <sup>iii</sup> | 2.629 (10) | La3—O7 <sup>iii</sup> | 2.635 (11) |
| La3—O8                | 2.378 (12) | La3—O12               | 2.428 (10) |
| La3—O15               | 2.585 (10) | La3—O18               | 2.403 (9)  |

Symmetry codes: (i)  $-x+y+1, y, -z+1/2$ ; (ii)  $-x+y+1, -x+1, z$ ; (iii)  $-x+2, -x+y+1, -z+1$ .

**Table S5.** Selected bond distances (Å) for compound **1R** at 298K.

| Bond                  | Dist.      | Bond                  | Dist.      |
|-----------------------|------------|-----------------------|------------|
| La1—O1                | 2.420 (8)  | La1—O3 <sup>i</sup>   | 2.767 (9)  |
| La1—O4 <sup>i</sup>   | 2.634 (8)  | La1—O15 <sup>i</sup>  | 2.552 (7)  |
| La1—O16 <sup>i</sup>  | 2.659 (8)  | La2—O6                | 2.587 (8)  |
| La2—O11               | 2.823 (9)  | La2—O12               | 2.500 (8)  |
| La2—O14               | 2.528 (8)  | La2—O17               | 2.526 (10) |
| La3—O2 <sup>ii</sup>  | 2.538 (10) | La3—O3                | 2.485 (8)  |
| La3—O6 <sup>iii</sup> | 2.659 (8)  | La3—O7 <sup>iii</sup> | 2.607 (9)  |
| La3—O8                | 2.383 (9)  | La3—O11               | 2.459 (9)  |
| La3—O15               | 2.559 (8)  | La3—O18               | 2.444 (7)  |

Symmetry codes: (i)  $-x+y, -x+1, z$ ; (ii)  $-y+1, x-y+1, z$ ; (iii)  $x-y+1, -y+2, -z+1$ .

**Table S6.** Selected bond distances (Å) for compound **1S** at 100K.

| Bond                  | Dist.     | Bond                  | Dist.     |
|-----------------------|-----------|-----------------------|-----------|
| La1—O1                | 2.417 (6) | La1—O3 <sup>i</sup>   | 2.757 (7) |
| La1—O4 <sup>i</sup>   | 2.606 (7) | La1—O12 <sup>i</sup>  | 2.512 (6) |
| La1—O13 <sup>i</sup>  | 2.645 (7) | La2—O6                | 2.592 (7) |
| La2—O11               | 2.455 (6) | La2—O14               | 2.504 (7) |
| La2—O15               | 2.841 (8) | La2—O17               | 2.508 (8) |
| La3—O2 <sup>ii</sup>  | 2.568 (8) | La3—O3                | 2.488 (7) |
| La3—O6 <sup>iii</sup> | 2.631 (8) | La3—O7 <sup>iii</sup> | 2.623 (8) |
| La3—O8                | 2.384 (9) | La3—O12               | 2.573 (7) |
| La3—O15               | 2.841 (8) | La3—O17               | 2.508 (8) |

Symmetry codes: (i)  $-y+1, x-y, z$ ; (ii)  $-x+y+1, -x+1, z$ ; (iii)  $-x+2, -x+y+1, -z+1$ .

**Table S7.** Selected bond distances (Å) for compound **1S** at 298K.

| Bond                                                                                 | Dist.      | Bond                  | Dist.      |
|--------------------------------------------------------------------------------------|------------|-----------------------|------------|
| La1—O1                                                                               | 2.407 (8)  | La1—O3 <sup>i</sup>   | 2.635 (9)  |
| La1—O4 <sup>i</sup>                                                                  | 2.787 (9)  | La1—O6 <sup>ii</sup>  | 2.514 (7)  |
| La1—O8 <sup>ii</sup>                                                                 | 2.661 (9)  | La2—O7                | 2.498 (8)  |
| La2—O9                                                                               | 2.487 (9)  | La2—O10               | 2.835 (9)  |
| La2—O12                                                                              | 2.576 (9)  | La2—O17               | 2.526 (11) |
| La3—O2                                                                               | 2.528 (11) | La3—O4 <sup>iii</sup> | 2.481 (9)  |
| La3—O6 <sup>ii</sup>                                                                 | 2.576 (8)  | La3—O10               | 2.439 (9)  |
| La3—O12 <sup>ii</sup>                                                                | 2.675 (9)  | La3—O13 <sup>ii</sup> | 2.612 (11) |
| La3—O14                                                                              | 2.371 (11) | La3—O18               | 2.375 (8)  |
| Symmetry codes: (i) $-x+y, y, -z+3/2$ ; (ii) $y, x, -z+1$ ; (iii) $-y+1, x-y+1, z$ . |            |                       |            |

## References

1. Sheldrick, G. M. SHELXT - Integrated space-group and crystal-structure determination. *Acta Crystallogr., Sect. A: Found. Adv.* **2015**, *71*, 3–8.
2. Dolomanov, O. V.; Bourhis, L. J.; Gildea, R. J.; Howard, J. A. K.; Puschmann, H. OLEX2: a complete structure solution, refinement and analysis program. *J. Appl. Cryst.* **2009**, *42*, 339–341.
3. Sheldrick, G. M. Crystal structure refinement with SHELXL. *Acta Cryst.* **2015**, *C71*, 3–8.
4. Spek, A. L. Single-crystal structure validation with the program PLATON. *J. Appl. Crystallogr.* **2003**, *36*, 7–13.
5. Lis, T. Preparation, structure, and magnetic properties of a dodecanuclear mixed-valence manganese carboxylate. *Acta Cryst.* **1980**, *B36*, 2042–2046.
